# Supplementary material
Source: PubMed Central journal article supplement (PMC8865543)
Supplement: jvi.01464-21-s0003.pdf [file jvi.01464-21-s0003.pdf]

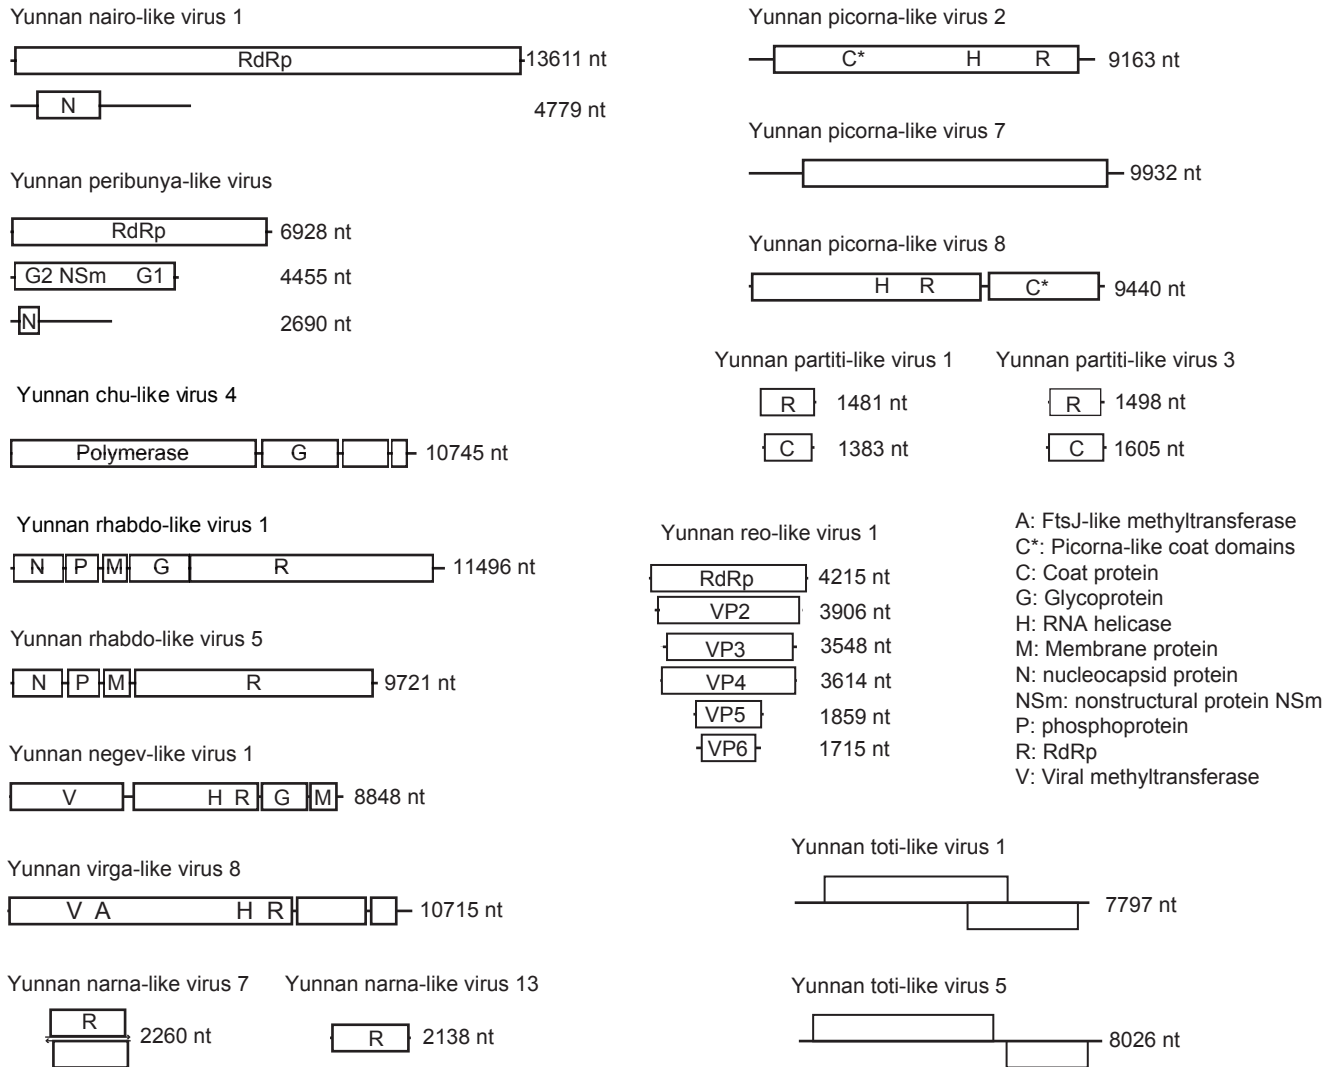

**Figure S1. Representative genome organizations of the viruses with (nearly) complete genomes carried by arthropods on the body surface of bats.** The genomes are drawn to a unified length scale. Predicted ORFs of these genomes are labeled with information on the potential protein or protein domain that they encode.
